# Supplementary material for: HER2 Amplification Level Predicts Pathological Complete Response in the Neoadjuvant Setting of HER2-Overexpressing Breast Cancer: A Meta-Analysis and Systematic Review
Source: MDPI journal article supplement (doi:10.3390/ijms24043590), 2023-02-10
Supplement: s1 [file s1]

## **Supplementary Figure Legends**

Supplementary Figure 1: Funnel plot for pathological complete response across studies

excluding Greenwell et al. P-value for publication bias = 0.06

Supplementary Figure 2: Risk of bias assessments for 3 randomized clinical trials.

Supplementary Figure 3: Risk of bias assessments for 5 observational studies

Supplementary Figure 4: Risk of bias assessment for 1 single-arm trial.

Supplementary Figure 5: Forest plot for pathological complete response according to the

HER2 interval (tertiles)

Supplementary Figure 6: Forest plot for pathological complete response according to the

HER2 interval (quartiles) and excluding the class with a HER2/CEP17 ratio  $\leq 2$

Supplementary Figure

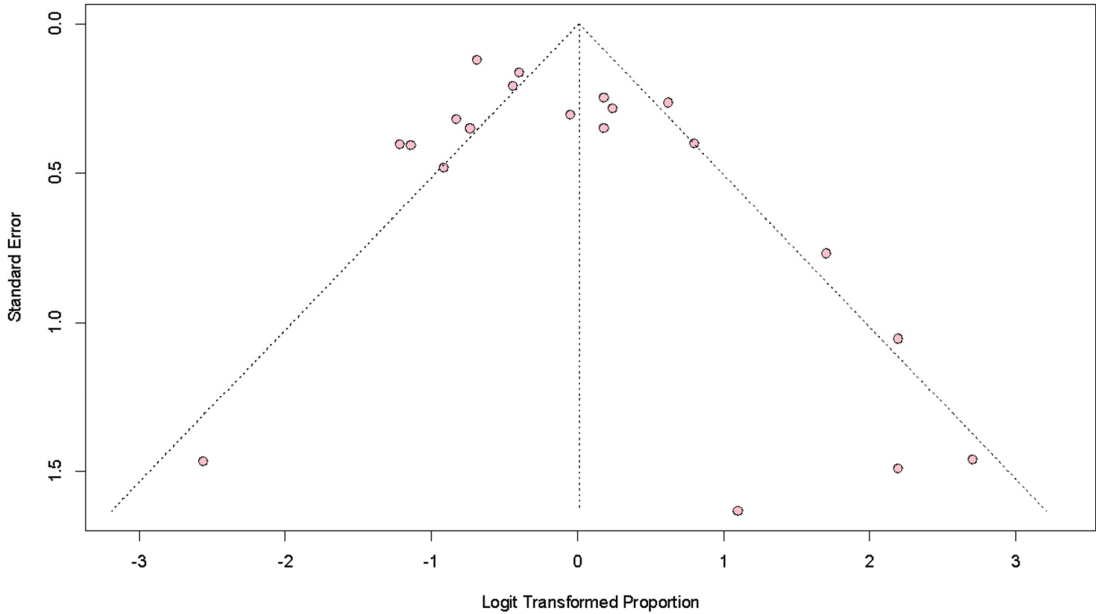

Supplementary Figure 1

|       |                        | Risk of bias domains                                                              |                                                                                   |                                                                                   |                                                                                    |                                                                                     |                                                                                     |
|-------|------------------------|-----------------------------------------------------------------------------------|-----------------------------------------------------------------------------------|-----------------------------------------------------------------------------------|------------------------------------------------------------------------------------|-------------------------------------------------------------------------------------|-------------------------------------------------------------------------------------|
|       |                        | D1                                                                                | D2                                                                                | D3                                                                                | D4                                                                                 | D5                                                                                  | Overall                                                                             |
| Study | Hurvitz SA et al. 2020 |  |  |  |  |  |  |
|       | Wu Z et al. 2018       |  |  |  |  |  |  |
|       | Singer CF et al. 2017  |  |  |  |  |  |  |

Domains:  
D1: Bias arising from the randomization process.  
D2: Bias due to deviations from intended intervention.  
D3: Bias due to missing outcome data.  
D4: Bias in measurement of the outcome.  
D5: Bias in selection of the reported result.

Judgement  
 Some concerns  
 Low

Supplementary Figure 2

|       |                         | Risk of bias domains                                                                                                                                                                                                                                                                                                                          |                                                                                   |                                                                                   |                                                                                   |                                                                                    |                                                                                     |                                                                                     |                                                                                                                                                                                                                   |
|-------|-------------------------|-----------------------------------------------------------------------------------------------------------------------------------------------------------------------------------------------------------------------------------------------------------------------------------------------------------------------------------------------|-----------------------------------------------------------------------------------|-----------------------------------------------------------------------------------|-----------------------------------------------------------------------------------|------------------------------------------------------------------------------------|-------------------------------------------------------------------------------------|-------------------------------------------------------------------------------------|-------------------------------------------------------------------------------------------------------------------------------------------------------------------------------------------------------------------|
|       |                         | D1                                                                                                                                                                                                                                                                                                                                            | D2                                                                                | D3                                                                                | D4                                                                                | D5                                                                                 | D6                                                                                  | D7                                                                                  | Overall                                                                                                                                                                                                           |
| Study | Antolin S et al. 2021   |                                                                                                                                                                                                                                                              |  |  |  |  |  |  |                                                                                                                                |
|       | Greenwell K et al. 2020 |                                                                                                                                                                                                                                                              |  |  |  |  |  |  |                                                                                                                                |
|       | Kogawa et al. 2016      |                                                                                                                                                                                                                                                              |  |  |  |  |  |  |                                                                                                                                |
|       | Guiu S et al. 2010      |                                                                                                                                                                                                                                                              |  |  |  |  |  |  |                                                                                                                                |
|       | Arnould L et al. 2007   |                                                                                                                                                                                                                                                              |  |  |  |  |  |  |                                                                                                                                |
|       |                         | <div>Domains:<br/>D1: Bias due to confounding.<br/>D2: Bias due to selection of participants.<br/>D3: Bias in classification of interventions.<br/>D4: Bias due to deviations from intended interventions.<br/>D5: Bias due to missing data.<br/>D6: Bias in measurement of outcomes.<br/>D7: Bias in selection of the reported result.</div> |                                                                                   |                                                                                   |                                                                                   |                                                                                    |                                                                                     |                                                                                     | <div>Judgement<br/> Moderate<br/> Low</div> |

Supplementary Figure 3

|       |                                                                                                                                                                                                                                                                                                                                                                | Risk of bias domains                                                              |                                                                                   |                                                                                   |                                                                                   |                                                                                     |                                                                                     |                                                                                     |                                                                                                                 |
|-------|----------------------------------------------------------------------------------------------------------------------------------------------------------------------------------------------------------------------------------------------------------------------------------------------------------------------------------------------------------------|-----------------------------------------------------------------------------------|-----------------------------------------------------------------------------------|-----------------------------------------------------------------------------------|-----------------------------------------------------------------------------------|-------------------------------------------------------------------------------------|-------------------------------------------------------------------------------------|-------------------------------------------------------------------------------------|-----------------------------------------------------------------------------------------------------------------|
|       |                                                                                                                                                                                                                                                                                                                                                                | D1                                                                                | D2                                                                                | D3                                                                                | D4                                                                                | D5                                                                                  | D6                                                                                  | D7                                                                                  | Overall                                                                                                         |
| Study | Veeraraghavan J et al. 2019                                                                                                                                                                                                                                                                                                                                    |  |  |  |  |  |  |  |                              |
|       | <p>Domains:</p> <p>D1: Bias due to confounding.</p> <p>D2: Bias due to selection of participants.</p> <p>D3: Bias in classification of interventions.</p> <p>D4: Bias due to deviations from intended interventions.</p> <p>D5: Bias due to missing data.</p> <p>D6: Bias in measurement of outcomes.</p> <p>D7: Bias in selection of the reported result.</p> |                                                                                   |                                                                                   |                                                                                   |                                                                                   |                                                                                     |                                                                                     |                                                                                     | <p>Judgement</p> <p> Low</p> |

Supplementary Figure 4

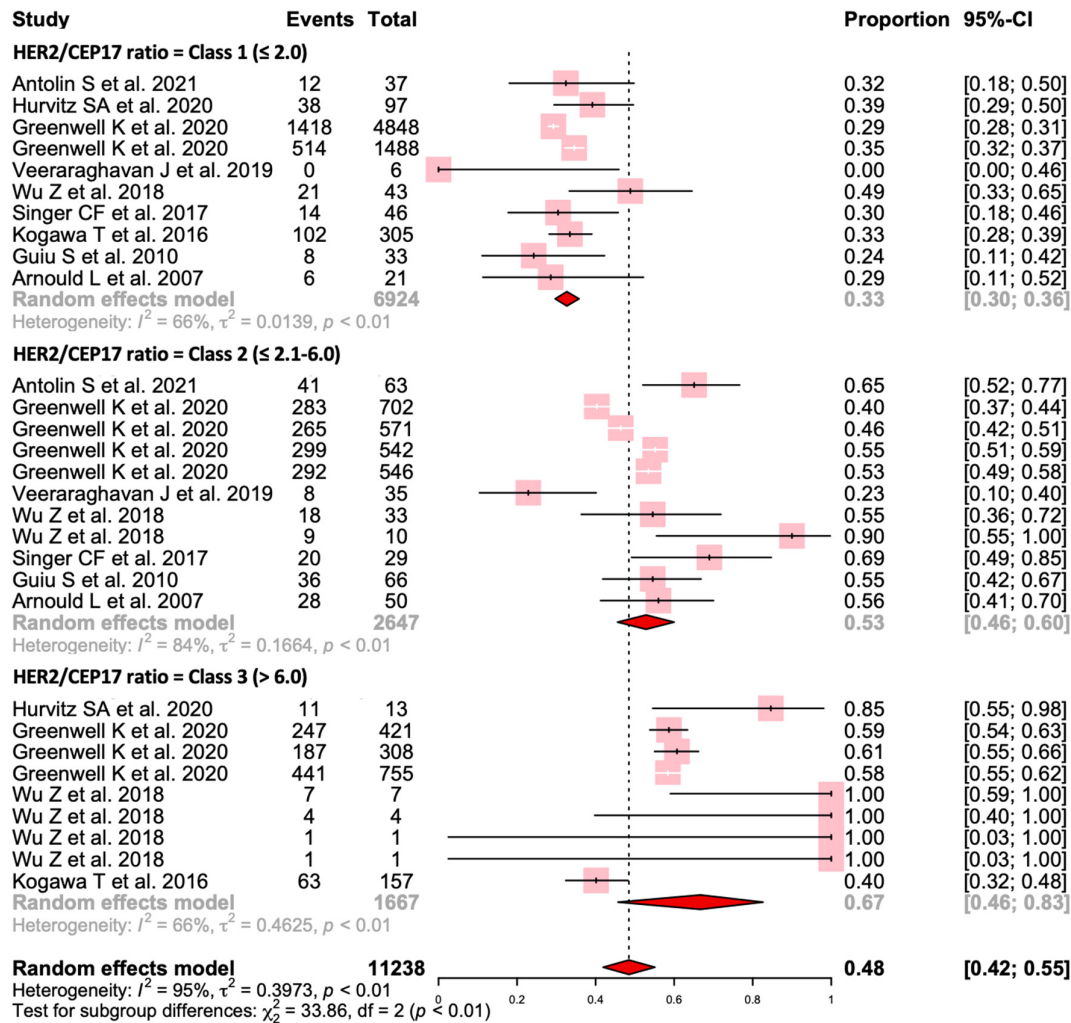

Supplementary Figure 5

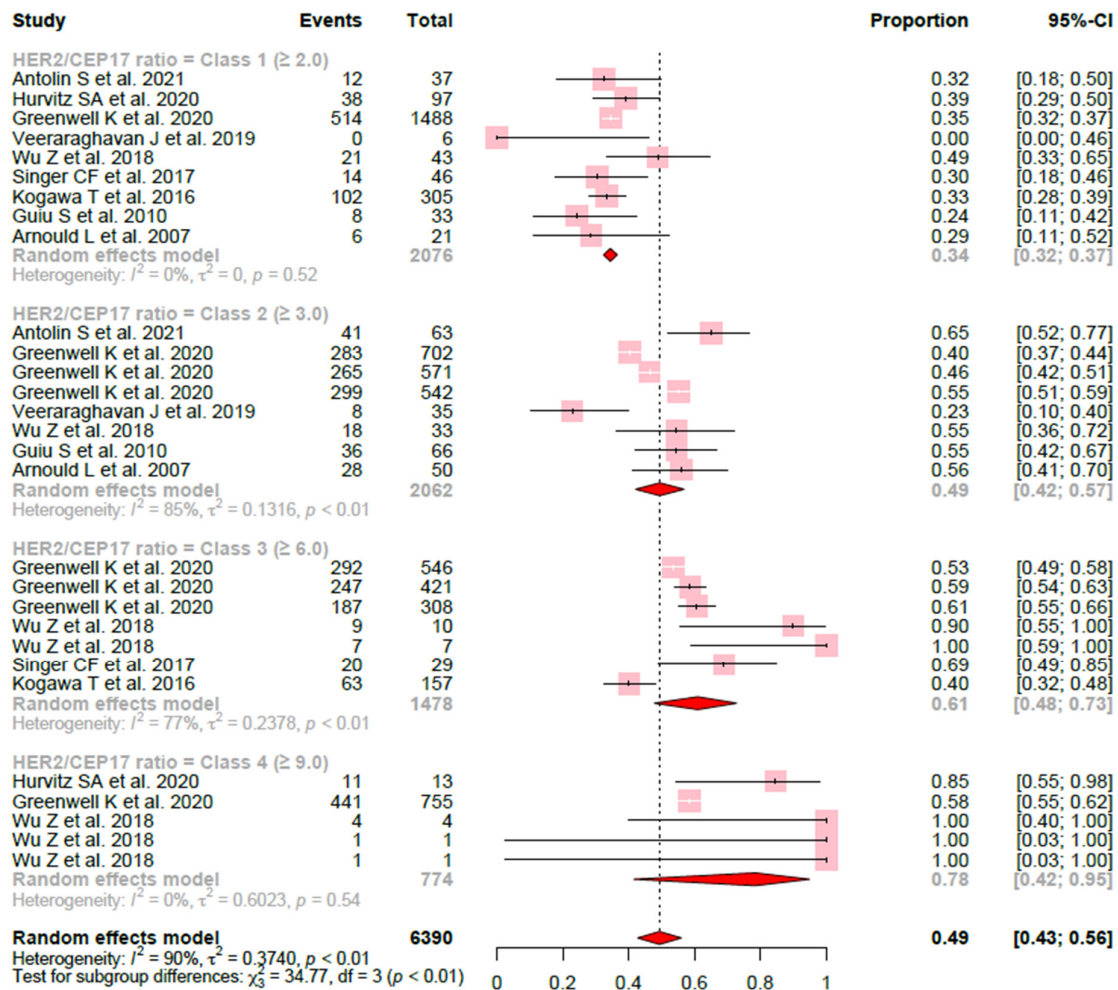

Supplementary Figure 6
